# Supplementary material for: Detection of Silver Nanoparticles in Seawater Using Surface-Enhanced Raman Scattering
Source: Nanomaterials (Basel). 2021 Jun 29;11(7):1711. doi: 10.3390/nano11071711 (PMC8308189; doi:10.3390/nano11071711)
Supplement: Supplementary file 1 [file nanomaterials-11-01711-s001.zip › nanomaterials-1266150-supplementary.pdf]

Supporting information

# Detection of Silver Nanoparticles in Seawater Using Surface-Enhanced Raman Scattering

Monica Quarato<sup>1</sup>, Ivone Pinheiro<sup>1</sup>, Ana Vieira<sup>1</sup>, Begoña Espiña<sup>1</sup>, Laura Rodriguez-Lorenzo<sup>1\*</sup>

<sup>1</sup> International Iberian Nanotechnology Laboratory (INL), Avda Mestre José Veiga, 4715-310, Braga, Portugal; monica.quarato@inl.int (M.Q.); ivone.pinheiro@inl.int (I. P.); ana.viera@inl.int (A. V.); Begoña.Espiña@inl.int (B. E.); laura.rodriguez-lorenzo@inl.int (L.R.-L.)

\* Correspondence: laura.rodriguez-lorenzo@inl.int (L.R.-L.)

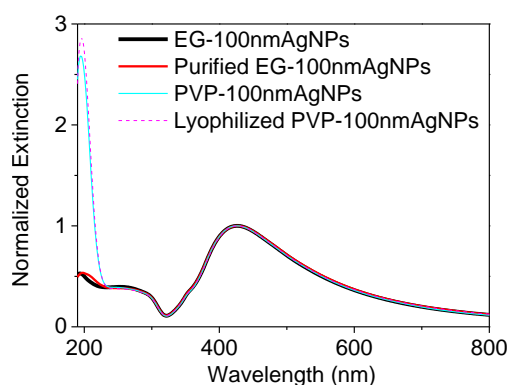

| NPs                         | [NPs] / mg/L | $D_H^a$ (PDI) <sup>b</sup> / nm |
|-----------------------------|--------------|---------------------------------|
|                             |              | Ultrapure water                 |
| EG <sup>c</sup> -100nmAgNPs | 13.3         | 120 ± 1 (0.19 ± 0.06)           |
| Purified EG-100nmAgNPs      | 60           | 110 ± 2 (0.28 ± 0.04)           |
| PVP-100nmAgNPs              | 60           | 120 ± 1 (0.29 ± 0.04)           |
| Lyophilized PVP-100nmAgNPs  | 60           | 131 ± 1 (0.25 ± 0.04)           |

<sup>a</sup> Mean hydrodynamic diameter was obtained by DLS at room temperature and at a scattering angle of 90° for 60 s. DLS measurements were carried out on 5 runs: Mean ± Standard deviation (SD).  
<sup>b</sup> Polydispersity index  
<sup>c</sup> EC=Ethylene glycol

**Figure S1.** Characterization of physico-chemical properties of AgNPs with a diameter of 100 nm as a function of each purification and functionalization step. AgNPs remained colloiddally stable after purification and PVP functionalization (PVP-100nmAgNPs).

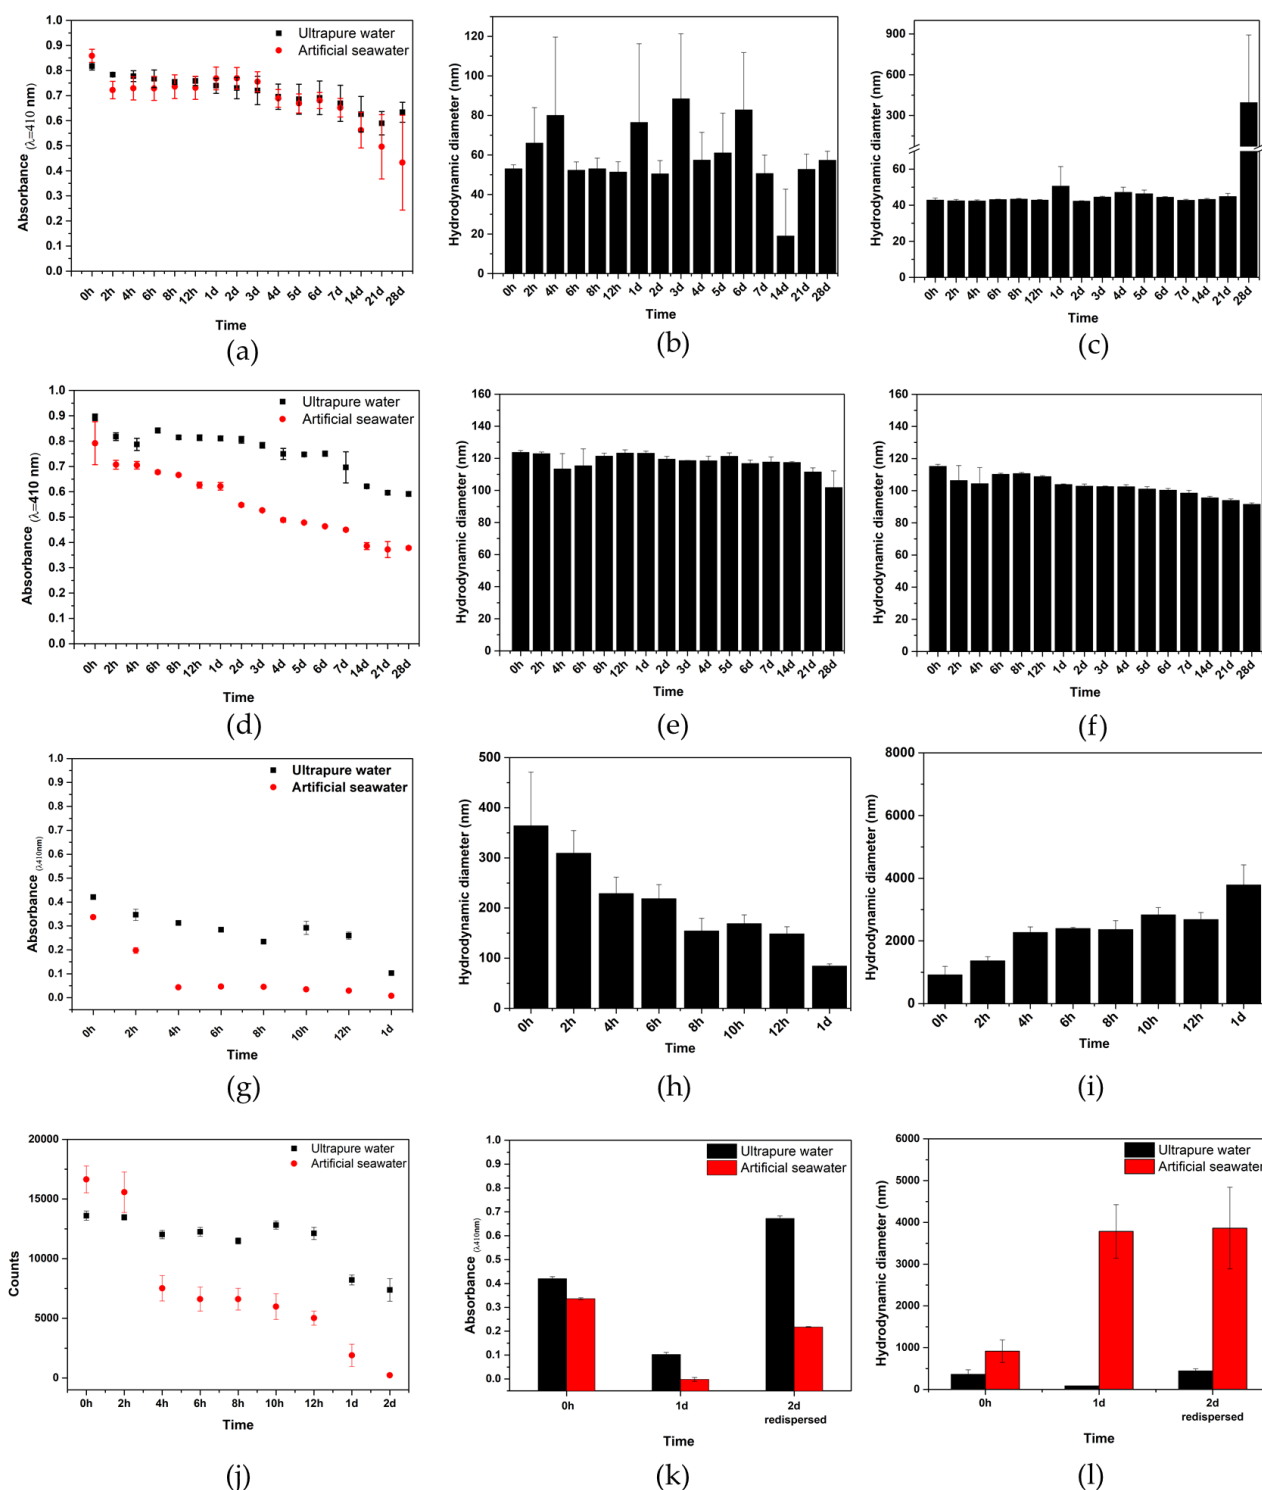

**Figure S2.** (a, d, g) Spectral evolution of optical absorbance and hydrodynamic size evolution (obtained by DLS, scattering angle of  $173^\circ$  and  $20^\circ\text{C}$ ) of PVP-Ag15nm NPs (first line), PVP-Ag100nm NPs (second line), PVP-Ag50-80nm NPs (third line). The NPs are dispersed in both (b, e, h) ultrapure water and (c, f, i) artificial seawater at initial concentration of 12.5 mg/L for PVP-Ag15nm NPs and PVP-Ag100nm NPs and 50 mg/L for PVP-Ag50-80nm NPs. The particles were monitored over 30 days for single particles and 1 day for the aggregates at room temperature. In the case of PVP-Ag15nm NPs, the particles stay colloidal stable over the time. In the case of PVP-100nmAg NPs, a decay of LSPR band is observed over time, which is due to likely the sedimentation of the NPs. In the last case, PVP-Ag50-80nm NPs show not only a decay of LSPR band due to the fast sedimentation but also a variation in the hydrodynamic size where the sedimentation of big aggregates occurs since the first hours. (j, k) Particles counts of PVP-Ag50-80nm NPs demonstrating that after 1 day, complete sedimentation occurs. This is also confirmed by the decay of LSPR band at 1 day and its consequently increase after redispersion. (l) Hydrodynamic size evolution of PVP-Ag50-80nm NPs when in ultrapure water and artificial seawater revealing that despite the fast sedimentation, the particles keep the same size after redispersion.

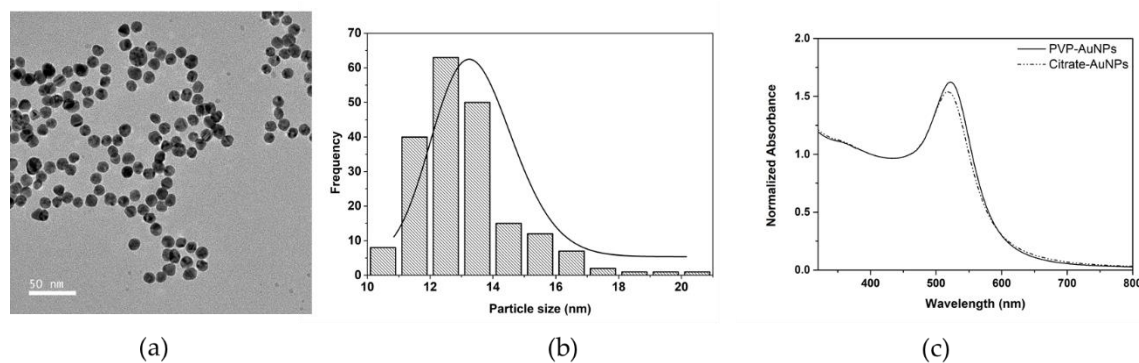

**Figure S3.** (a) Representative TEM images of spherical AuNPs used as seed in the AuNSs synthesis and (b) their histogram. The TEM analysis reveals a diameter of  $13 \pm 2$  nm. (c) UV-Vis spectrum before and after PVP coating of AuNPs.

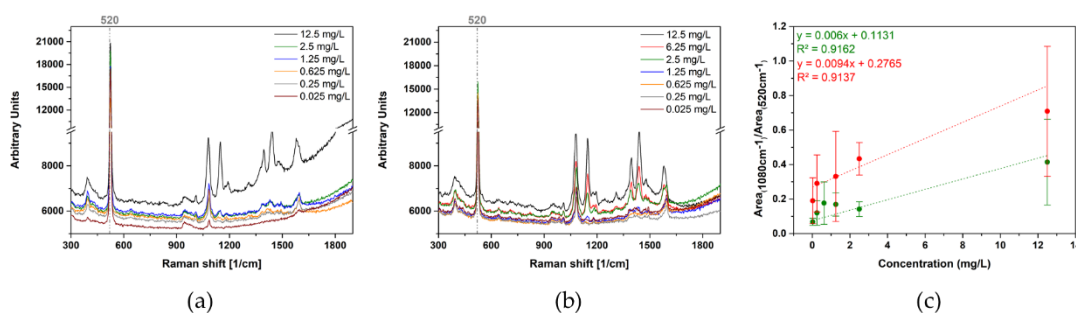

**Figure S4.** SERS analysis of PVP-15nmAgNPs dispersed in both (a) ultrapure water and (b) artificial seawater at different concentration. A confocal Raman microscope was used to perform the average SERS experiments using a 10 $\times$  objective and 785 nm as excitation laser line. (c) Experimentally determined calibration curves for the detection of these AgNPs in ultrapure water (green) and artificial seawater (red). A linear relationship between the AgNPs concentration and the normalized area under the peak at 1080  $\text{cm}^{-1}$  was found at the range study here. The light-grey dashed line indicate the characteristic peak of silicon (520  $\text{cm}^{-1}$ ).
